# Supplementary material for: Redox-active self-assembled monolayers as novel solid contacts for ion-selective electrodes
Source: Royal Society of Chemistry journal article supplement (doi:10.1039/a909532b), 2000-01-01
Supplement: a909532b.pdf [file a909532b.pdf]

## Supplementary data

### Redox-Active Self-Assembled Monolayers as Novel Solid Contacts for Ion-Selective

#### Electrodes

Monia Fibbioli,<sup>a</sup> Krisanu Bandyopadhyay,<sup>b</sup> Sheng-Gao Liu,<sup>b</sup> Luis Echegoyen,<sup>\*b</sup> Olivier Enger,<sup>a</sup>  
François Diederich,<sup>\*a</sup> Philippe Bühlmann,<sup>c</sup> Ernö Pretsch<sup>\*a</sup>

<sup>a</sup> *Laboratorium für Organische Chemie, Swiss Federal Institute of Technology (ETH)*

*CH-8092 Zürich, Switzerland*

<sup>b</sup> *Department of Chemistry, University of Miami,*

*Coral Gables, FL 33124*

<sup>c</sup> *Department of Chemistry, School of Science, The University of Tokyo, Hongo 7-3-1, Bunkyo-ku,  
Tokyo 113-0033, Japan*

#### General experimental

Reagents and solvents were purchased reagent-grade and used without further purification, except for CH<sub>2</sub>Cl<sub>2</sub> and THF which were distilled under N<sub>2</sub> in the presence of CaH<sub>2</sub> and sodium benzophenone ketyl, respectively. Fullerene soot extract was purchased from *MER Corporation*, Tucson, Arizona (AZ) 85706, USA. All reactions were performed in standard glassware. Evaporation and concentration *in vacuo* were done at water aspirator pressure, and compounds were dried at 10<sup>-2</sup> Torr. Flash column chromatography: SiO<sub>2</sub> 60 (230-400 mesh, 0.040-0.063 mm) from *E. Merck*, SiO<sub>2</sub> H (5-40 µm) from *Fluka*. TLC aluminum plates coated with SiO<sub>2</sub> 60 F<sub>254</sub> from *E. Merck*; visualization by UV light (254 or 366 nm). IR Spectra: *Perkin Ekmer 1600-FTIR or 2000-FTIR*. UV/VIS Spectra: *Varian-CARY-5 or Shimadzu UV-2101PC* spectrophotometer. NMR Spectra: *Varian Gemini 300 or 200* spectrometers at 296 or 300 °K, with solvent peaks as reference.

EI-MS: *VG Tribid* instrument, 70 eV. FAB-MS: *VG ZAB 2SEQ* or *VG MASSLAB TRIO-2* instrument, *m*-nitrobenzyl alcohol as matrix. MALDI-TOF-MS: *Bruker REFLEX* spectrometer; spectra with reflectron detection were measured in the positive-ion mode and acceleration voltage 15 kV, 3-indolacrylic acid as matrix. HR-FAB-MS: *micromass Quattro I* spectrometer in the positive FAB mode with a resolution of 10 K. Elemental analyses were performed by the Mikrolabor at the Laboratorium für Organische Chemie, ETH-Zürich. IR spectra for SAM with **1** and **2** were recorded at grazing incidence reflection on a *Bruker IFS 66 V* spectrometer equipped with a MCT detector. The measurements were performed at an incident angle of 80° with a fixed angle inset and at a pressure in the sample chamber of 1 mbar.

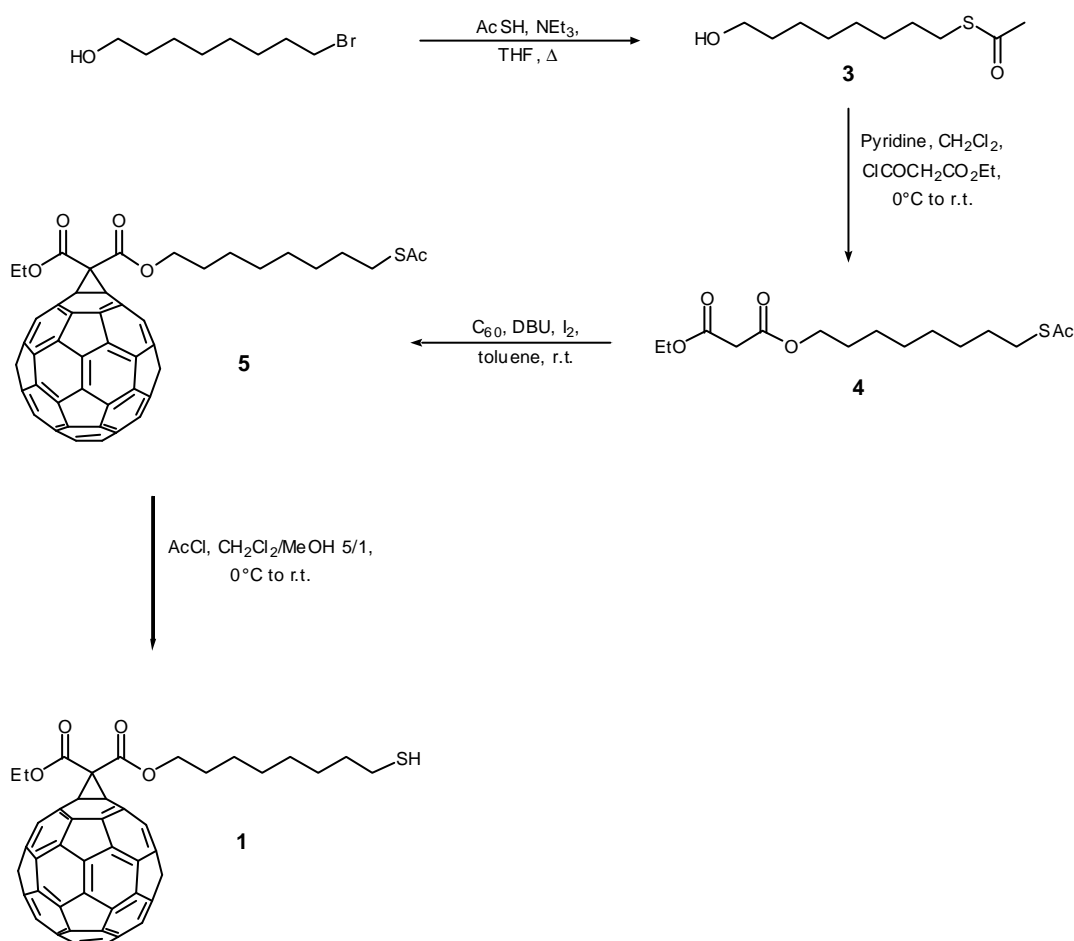

**Synthetic pathway to fullerene derivative 1**

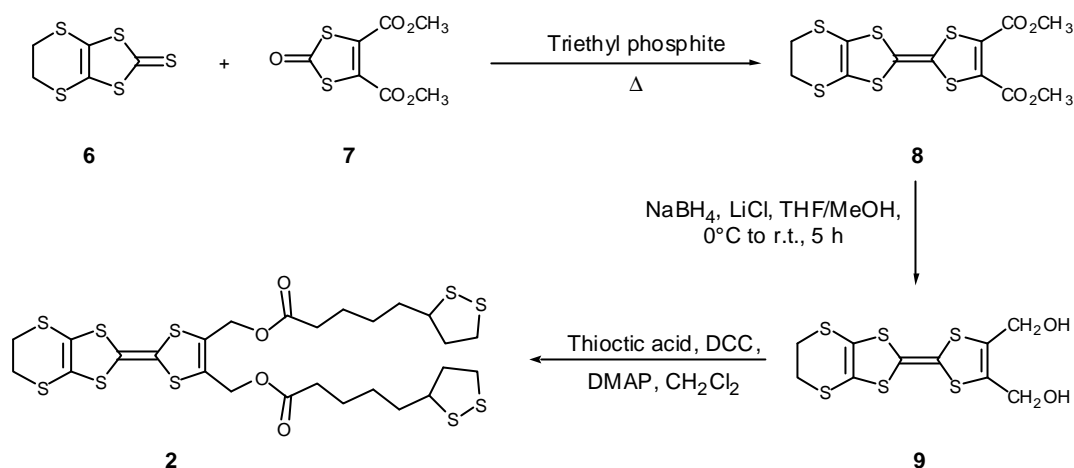

### Synthetic pathway to TTF derivative 2

**S-(8-Hydroxyoctyl) thioacetate 3.**  $\text{NEt}_3$  (97%, 0.37 ml, 2.55 mmol) and thioacetic acid (96%, 0.19 ml, 2.55 mmol) were stirred in dry THF (20 ml) at r.t. for 1 h. To this solution, 8-bromo-1-octanol (0.3 ml, 1.70 mmol) was added dropwise over 30 min. The resulting slurry was stirred 12 h at r.t., then dist.  $\text{H}_2\text{O}$  (100 ml) was added followed by extraction with AcOEt (2×50 ml). The combined organic layers were washed with dist.  $\text{H}_2\text{O}$  (2×50 ml). The crude mixture was subjected to flash column chromatography ( $\text{SiO}_2$  H, hexane/AcOEt 9:1) to afford (248 mg, 71%) **3** as a colorless oil: (Found: C, 58.89; H, 10.01; S, 15.48.  $\text{C}_{10}\text{H}_{20}\text{O}_2\text{S}$  requires C, 58.78; H, 9.87; O, 15.66; S, 15.69%);  $\nu_{\text{max}}(\text{KBr})/\text{cm}^{-1}$  2993, 2856, 1686, 1461, 1356, 1136, 1111, 956;  $\delta_{\text{H}}$  (300 MHz,  $\text{CDCl}_3$ ) 1.28-1.40 (8 H, m,  $\text{CH}_2$ ), 1.51-1.58 (4 H, m,  $\text{CH}_2$ ), 2.31 (3 H, s,  $\text{S(O)C-CH}_3$ ), 2.85 (2 H, t,  $J$  7.5,  $-\text{CH}_2\text{-S-}$ ), 3.62 (2 H, t,  $J$  6.6,  $-\text{CH}_2\text{-OH}$ );  $\delta_{\text{C}}$  (50 MHz,  $\text{CDCl}_3$ ) 23.17, 26.22, 26.53, 26.63, 26.72, 26.98, 28.15, 30.25 ( $\text{CH}_2$  and  $\text{S(O)C-CH}_3$ ), 60.53 ( $-\text{CH}_2\text{-OH}$ ), 193.88 ( $\text{S(O)C-CH}_3$ );  $m/z$  (EI-MS) 43 ( $[\text{C(O)CH}_3]^+$ , 100%), 143 ( $[\text{M} - \text{SCH}_2\text{CH}_2]^+$ , 14%), 161 ( $[\text{M} - \text{C(O)CH}_3]^+$ , 3%), 186 ( $[\text{M} - \text{H}_2\text{O}]^+$ , 0.3%), 204 ( $\text{M}^+$ , 0.4%).

**[8-(Acetylsulfanyl)octyl] ethyl malonate 4.** Ethyl-3-chloro-3-oxopropanoate (95%, 0.83 ml, 6.18 mmol) was added dropwise to a solution of **3** (631 mg, 3.9 mmol) and pyridine (0.50 ml, 6.18 mmol) in dry  $\text{CH}_2\text{Cl}_2$  (30 ml) at 0 °C over 15 min. The reaction was allowed to warm slowly

up to r.t. for 10 h, then washed with sat. aq.  $\text{NH}_4\text{Cl}$  solution (3×30 ml) and dist.  $\text{H}_2\text{O}$  (2×100 ml). The organic phase was dried over  $\text{MgSO}_4$  and concentrated under reduced pressure. The resulting yellow oil was purified by distillation under reduced pressure (bp 120-122 °C at 0.1 mm Hg) to yield 696 mg (2.19 mmol, 70%) of **4** as a colorless oil: ( Found: C, 56.57; H, 8.00; S, 9.94.  $\text{C}_{15}\text{H}_{26}\text{O}_5\text{S}$  requires C, 56.58; H, 8.23; O, 25.12; S, 10.07%);  $\nu_{\text{max}}(\text{KBr})/\text{cm}^{-1}$  3011, 2934, 2858, 1707, 1728, 1686, 1332, 1148, 1032, 957;  $\delta_{\text{H}}$  (200 MHz,  $\text{CDCl}_3$ ) 1.25-1.33 (15 H, t,  $J$  7.2, and br s,  $\text{CH}_3\text{-CH}_2\text{-O-}$  and  $\text{CH}_2$ ), 2.33 (3 H, s,  $\text{S(O)C-CH}_3$ ), 2.87 (2 H, t,  $J$  7.0,  $\text{-CH}_2\text{-S-}$ ), 3.37 (2 H, s,  $\text{(O)C-CH}_2\text{-C(O)}$ ), 4.14 (2 H, t,  $J$  6.6,  $\text{-CH}_2\text{-CH}_2\text{-O-}$ ), 4.21 (2 H, q,  $J$  7.0,  $\text{CH}_3\text{-CH}_2\text{-O-}$ );  $\delta_{\text{C}}$  (50 MHz,  $\text{CDCl}_3$ ) 14.08 ( $\text{CH}_3\text{-CH}_2\text{-O-}$ ), 25.70, 28.42, 28.68, 28.95, 29.02, 29.10, 29.47 ( $\text{CH}_2$ ), 30.65 ( $\text{S(O)C-CH}_3$ ), 41.7 ( $\text{(O)C-CH}_2\text{-C(O)}$ ), 61.50, 65.61 ( $\text{-CH}_2\text{-O-C(O)}$ ), 166.73 ( $\text{-O-C(O)}$ ), 196.06 ( $\text{-S-C(O)}$ );  $m/z$  (EI-MS) 43 ( $[\text{C(O)CH}_3]^+$ , 100%), 258 ( $[\text{M} - \text{SCH}_2\text{CH}_2]^+$ , 3%), 275 ( $[\text{M} - \text{C(O)CH}_3]^+$ , 4%), 318 ( $\text{M}^+$ , 2%).

**8-(Acetylsulfanyl)octyl ethyl 1,2-methano[60]fullerene-61,61-dicarboxylate 5.** DBU (1.04 ml, 6.94 mmol) was added to a solution of  $\text{C}_{60}$  (3.00 g, 4.16 mmol),  $\text{I}_2$  (1.32 g, 5.20 mmol), and **4** (1.10 g, 3.47 mmol) in degassed toluene (3 l). The mixture was stirred overnight, then filtered through a short plug ( $\text{SiO}_2$ ), eluting first with toluene to remove iodine and unreacted  $\text{C}_{60}$  and then with  $\text{CH}_2\text{Cl}_2$ . This red-brown fraction was then purified by flash column chromatography ( $\text{SiO}_2$  H, gradient  $\text{CH}_2\text{Cl}_2$ /hexane 2:8 to  $\text{CH}_2\text{Cl}_2$ ) to yield 1.83 g (1.76 mmol, 51%) of **5** as a red-brown solid: (Found: C, 85.14; H, 2.88.  $\text{C}_{75}\text{H}_{24}\text{O}_5\text{S}\cdot\text{CH}_3\text{OH}$  requires C, 85.38; H, 2.64; O, 8.98; S, 3.00%);  $\nu_{\text{max}}(\text{KBr})/\text{cm}^{-1}$  2922, 2844, 1742, 1687, 1461, 1428, 1232, 1094, 1056, 700, 622, 578, 528;  $\lambda_{\text{max}}(\text{CH}_2\text{Cl}_2)/\text{nm}$  ( $\epsilon$ ) 687 (220), 490 (1590), 426 (2840), 414 (2570), 401 (3670), 394 (5290), 326 (39100), 258 (126400);  $\delta_{\text{H}}$  (200 MHz,  $\text{CDCl}_3$ ) 1.25-1.92 (15 H, m,  $\text{CH}_3\text{-CH}_2\text{-O-}$  and  $\text{CH}_2$ ), 2.33 (3 H, s,  $\text{S(O)C-CH}_3$ ), 2.87 (2 H, t,  $J$  7.2,  $\text{-CH}_2\text{-S-}$ ), 4.50 (2 H, t,  $J$  6.6,  $\text{-CH}_2\text{-CH}_2\text{-O-}$ ), 4.57 (2 H, q,  $J$  7.4,  $\text{CH}_3\text{-CH}_2\text{-O-}$ );  $\delta_{\text{C}}$  (125 MHz,  $\text{CDCl}_3$ ) 14.26 ( $\text{CH}_3\text{-CH}_2\text{-O-}$ ), 25.90, 28.55, 28.71, 29.04, 29.09, 29.68 ( $\text{CH}_2$ ), 30.65 ( $\text{S(O)C-CH}_3$ ), 52.34 ( $\text{(O)C-CH}_2\text{-C(O)}$ ), 63.41, 67.39 ( $\text{-CH}_2\text{-O-C(O)}$ ),

71.65 (C(fullerene)-C-(C(O)-)<sub>2</sub>), 138.94, 139.08, 140.95, 141.91, 141.92, 142.21, 142.98, 143.00, 143.02, 143.08, 143.09, 143.89, 144.61, 144.65, 144.68, 144.69, 144.88, 145.17, 145.17, 145.18, 145.20, 145.26, 145.31, 145.40 (C(fullerene)), 163.57, 163.68 (-O-C(O)), 195.96 (-S-C(O)); *m/z* (MALDI-TOF-MS) 1038 ([MH]<sup>+</sup>, calc. for <sup>12</sup>C<sub>75</sub>H<sub>24</sub>O<sub>5</sub>S: 1037.1), 1060 ([M + Na]<sup>+</sup>).

**Ethyl (8-Sulfanyloctyl) 1,2-methano[60]fullerene-61,61-dicarboxylate 1.** To a solution of **5** (84 mg, 0.08 mmol) in a mixture of 3 ml of methanol and 45 ml of CH<sub>2</sub>Cl<sub>2</sub> at 0 °C, was added dropwise acetyl chloride (98%, 2 ml, 27.57 mmol). The resulting mixture was stirred at r.t. for 5 h, then washed with H<sub>2</sub>O (50 ml). The organic phase was evaporated and the brown residue was purified by flash column chromatography (SiO<sub>2</sub>, CH<sub>2</sub>Cl<sub>2</sub>/hexane 1:1) to yield 77 mg (0.08 mmol, 96%) of **1** as a brown solid. *v*<sub>max</sub>(KBr)/cm<sup>-1</sup> 2922, 2844, 1743, 1461, 1428, 1232, 1094, 1056, 806, 700, 578, 550, 526; *λ*<sub>max</sub>(CH<sub>2</sub>Cl<sub>2</sub>)/nm (ε) 688 (230), 491 (1680), 426 (2860), 414 (2690), 401 (3880), 394 (5400), 326 (27500), 258 (92000); δ<sub>H</sub> (300 MHz, CDCl<sub>3</sub>) 1.25-1.63 (14 H, m, CH<sub>3</sub>-CH<sub>2</sub>-O- and CH<sub>2</sub>), 1.85 (2 H, br quin., *J* 6.9, -CH<sub>2</sub>-CH<sub>2</sub>-SH), 2.53 (2 H, q, *J* 7.2, -CH<sub>2</sub>-SH), 4.50 (2 H, t, *J* 6.6, -CH<sub>2</sub>-CH<sub>2</sub>-O-), 4.57 (2 H, q, *J* 6.9, CH<sub>3</sub>-CH<sub>2</sub>-O-); δ<sub>C</sub> (125 MHz, CDCl<sub>3</sub>) 14.26 (CH<sub>3</sub>-CH<sub>2</sub>-O-), 24.62, 25.93, 28.27, 28.57, 29.02, 29.69, 33.97 (CH<sub>2</sub>), 52.52 ((O)C-CH<sub>2</sub>-C(O)), 63.42, 67.40 (-CH<sub>2</sub>-O-C(O)), 71.66 (C(fullerene)-C-(C(O)-)<sub>2</sub>), 138.94, 139.10, 140.96, 141.92, 142.22, 142.99, 143.02, 143.04, 143.10, 143.90, 144.62, 144.70, 144.90, 145.20, 145.28, 145.31, 145.42 (C(fullerene)), 163.59, 163.70 (-O-C(O)). *m/z* (FAB-MS) 994 (M<sup>+</sup>, 35%), 720 (C<sub>60</sub><sup>+</sup>, 100%); *m/z* (HR-FAB-MS) 994.1243 (M<sup>+</sup>, C<sub>73</sub>H<sub>22</sub>O<sub>4</sub>S calc. 994.1239).

**2,3-bis(hydroxymethyl)-6,7-(ethylenedithio) tetrathiafulvalene 9.** To a 100 ml three-necked round-bottom flask was added **8** (1.0 g, 2.43 mmol), 60 ml of dry THF and 15 ml of methanol. The mixture was stirred and cooled to 0 °C. Then, NaBH<sub>4</sub> (0.8 g, 21.14 mmol) and LiCl (0.9 g, 21.23 mmol) were added slowly under nitrogen. After stirring at 0 °C for about 2 h, the cooling bath was removed and stirring continued for an additional 3 h at room temperature. The

reaction mixture was then cooled down again at 0 °C, and 30 ml of a sat. aq. NH<sub>4</sub>Cl solution was added dropwise. After the addition, the mixture was extracted three times with AcOEt (3×100 ml) and the combined organic layers were washed with sat. aq. NaCl solution (2×40 ml), and dried over Na<sub>2</sub>SO<sub>4</sub>. After removal of the solvent, the crude product was collected and washed with CH<sub>2</sub>Cl<sub>2</sub> (3×5 ml) to afford 650 mg (1.82 mmol, 75%) of **9** as pale-yellow powder.  $\nu_{\max}(\text{KBr})/\text{cm}^{-1}$  3257, 1007;  $\delta_{\text{H}}$  (300 MHz, (CD<sub>3</sub>)<sub>2</sub>SO) 3.37 (4 H, s, CH<sub>2</sub>-S), 4.22 (4 H, d, *J* 5.5, CH<sub>2</sub>-OH), 5.53 (2 H, t, *J* 5.6, CH<sub>2</sub>-OH);  $\delta_{\text{C}}$  (75 MHz, (CD<sub>3</sub>)<sub>2</sub>SO) 29.50 (CH<sub>2</sub>-S), 56.59 (CH<sub>2</sub>-OH), 101.03, 112.83, 116.81, 131.57 (C(sp<sup>2</sup>)); *m/z* (FAB-MS) 354 (M<sup>+</sup>, 100%). Characterization in agreement with literature<sup>9</sup>.

**2,3 - bis ( { [ 5 - (1,2 - dithiolan - 3 - yl) pentanoyl] oxy } methyl) - 6,7 - (ethylenedithio) tetrathiafulvalene **2**.** TTF derivative **9** (0.4 g, 1.13 mmol) was added to 15 ml of CH<sub>2</sub>Cl<sub>2</sub> along with thioctic acid (0.53 g, 2.56 mmol). The mixture was stirred for 15 min at 0°C under N<sub>2</sub>. Then DCC (0.95 g, 4.60 mmol) was added to the above solution along with DMAP (0.09 g, 0.736 mmol) in 10 ml cold CH<sub>2</sub>Cl<sub>2</sub>, and the mixture was stirred for another 15 min at 0 °C. The cooling bath was then removed and the solution allowed to warm to room temperature. After being stirred for 48 h under N<sub>2</sub>, the reaction mixture was filtered to afford a clear filtrate and the insoluble urea by-product as a fine white-gray powder. The solvent was removed by evaporation, and the residue was subjected to column chromatography (SiO<sub>2</sub>, CH<sub>2</sub>Cl<sub>2</sub>) to yield 694 mg (0.95 mmol, 84%) **2** as an orange-red oil.  $\nu_{\max}(\text{KBr})/\text{cm}^{-1}$  1007, 2928, 2852, 1733, 1709, 1628, 1538, 1228, 1157;  $\delta_{\text{H}}$  (300 MHz, CDCl<sub>3</sub>) 1.58-1.55 (4 H, m, -CH-CH<sub>2</sub>-), 1.76-1.71 (8 H, m, CH<sub>2</sub>), 1.93-1.90 (2 H, m, CH<sub>2</sub>-CH(dithiolane)), 2.38-2.33 (4 H, m, CH<sub>2</sub>-C(O)), 2.51-2.41 (2 H, m, CH<sub>2</sub>-CH(dithiolane)), 3.23-3.15 (4 H, m, CH<sub>2</sub>-S(dithiolane)), 3.29 (4 H, s, S-CH<sub>2</sub>-CH<sub>2</sub>-S), 3.56-3.54 (2 H, m, -CH(dithiolane)), 4.90 (4 H, s, CH<sub>2</sub>-O-);  $\delta_{\text{C}}$  (75 MHz, CDCl<sub>3</sub>) 23.35, 25.07, 26.72, 27.47 (CH<sub>2</sub>), 30.60 (S-CH<sub>2</sub>-CH<sub>2</sub>-S), 33.58, 35.28, 37.00 (CH<sub>2</sub>), 58.30 (CH<sub>2</sub>-O), 106.91, 114.36, 114.39, 129.95, 140.17 (C(TTF)), 173.10 (C=O); *m/z* (FAB-MS) 731 (M<sup>+</sup>, 100%); *m/z* (HR-FAB-MS) 730.9735 (M<sup>+</sup>, C<sub>26</sub>H<sub>34</sub>O<sub>4</sub>S<sub>10</sub> calc. 730.9735).

**IR of SAM with compound 1 and 2**

**1:** 2922, 2850, 1745, 1462, 1235, 1096, 1060.

**2:** 2928, 2850, 1739, 1627, *1539*.
